# Supplementary material
Source: publisher figshare collection journal article supplement (https://karger.figshare.com/articles/dataset/_/8159657)
Supplement: Supplementary file 1 [file 1]

Archive with 8 entries (8 files):
- 499962_sm6.pdf
- 499962_sm7.pdf
- 499962_sm8.pdf
- 499962_sm2.docx
- 499962_sm1.docx
- 499962_sm3.docx
- 499962_sm4.docx
- 499962_sm5.PDF
