# Supplementary material
Source: publisher figshare collection journal article supplement (https://karger.figshare.com/articles/dataset/_/8159657)
Supplement: Supplementary file 1 [file 1 › 499962_sm3.docx]

**Supplementary Table 3. Content of the aLiFE instructor training (2 days course)**

| **Topic** | **Content** |
| --- | --- |
| - The aLiFE programme: overview | - Introducing the different programme elements of aLiFE (theory) |
| - The aLiFE activity framework | - aLiFE activity modules (strength, neuromotor, physical activity), activity principles, and specific activities (theory and practice) |
| - The aLiFE assessment tool | - Applying the aLiFE assessment tool (theory and practice) |
| - The aLiFE behaviour change concept | - aLiFE behaviour change elements including the Health Action Process Approach, goal setting, action planning, habit formation, feedback and monitoring (theory and practice)* |
| - aLiFE material | - Using the participant manual, daily routine chart, activity planner, activity counter (theory and practice) |
| - Teaching aLiFE: home visit 1 | - Introducing aLiFE to the participant, tailoring and implementing first aLiFE activities (theory and practice) |
| - Teaching aLiFE: subsequent home visits | - Teaching new activities, upgrading existing activities (theory and practice) |
| - Test to receive certificate | - Multiple choice test about the different programme elements and content of aLiFE (theory) |

The aLiFE workshop was led by an exercise scientist (MS) and a psychologist (EB). An end-user (young senior) was also present. Practical work included teaching and practicing the different programme elements in groups of three people (one trainer, one participant, one observer providing feedback).
* For full outline of behaviour change concept and operationalisation see Boulton et al. [23].
