# Supplementary material
Source: publisher figshare collection journal article supplement (https://karger.figshare.com/articles/dataset/_/8159657)
Supplement: Supplementary file 1 [file 1 › 499962_sm5.PDF]

**Supplementary Table 5. Answers to the open question: “Please explain why you scored in this way and suggest any changes to the programme’?”**

| Category               | Positive ratings                                                                                                                                                                                                                                                                                                                                                       | Negative ratings and suggested improvements                                                                                                                                                                                                                                                                                                                                                                                                                                                                                                                                                         |
|------------------------|------------------------------------------------------------------------------------------------------------------------------------------------------------------------------------------------------------------------------------------------------------------------------------------------------------------------------------------------------------------------|-----------------------------------------------------------------------------------------------------------------------------------------------------------------------------------------------------------------------------------------------------------------------------------------------------------------------------------------------------------------------------------------------------------------------------------------------------------------------------------------------------------------------------------------------------------------------------------------------------|
| • aLiFE programme      | <ul style="list-style-type: none"> <li>• Good programme (n=2)</li> <li>• Programme was playful (n=2)</li> <li>• The program is easy and fun to do (n=1).</li> </ul>                                                                                                                                                                                                    |                                                                                                                                                                                                                                                                                                                                                                                                                                                                                                                                                                                                     |
| • Integrative approach | <ul style="list-style-type: none"> <li>• Integration of exercise into daily routines (n=5)</li> </ul>                                                                                                                                                                                                                                                                  | <ul style="list-style-type: none"> <li>• Starting the programme during winter would make it easier to integrate activities in daily routines, due to less unpredictable lifestyle (n=1)</li> <li>• I wish we could interact with the other participants during the programme (n=1)</li> </ul>                                                                                                                                                                                                                                                                                                       |
| • aLiFE activities     | <ul style="list-style-type: none"> <li>• Challenging activities for balance and flexibility of hips (n=1)</li> <li>• Noticeable effect on muscles and balance (n=1).</li> <li>• Tailored activities with a specific purpose (n=1)</li> <li>• Personalized training (n=1)</li> <li>• Awareness of possibilities to move more often was fun (n=1).</li> <li>•</li> </ul> | <ul style="list-style-type: none"> <li>• Some exercises were slightly exhausting and hard to execute including stepping over objects (n=1), and walking on heels and toes (n=1), two stairs at a time (n=3), jumping (n=2)</li> <li>• Integrate more activities including backwards walking (n=1)</li> <li>• If it gets to easy it becomes uninteresting (n=1)</li> <li>• Little benefit for people with an already active life (n=1)</li> <li>• Tailor more to physical capabilities (n=1)</li> <li>• Perform leaning just in front of a bed (n=1)</li> <li>• Too many activities (n=3)</li> </ul> |
| • aLiFE Trainer        | <ul style="list-style-type: none"> <li>• Skilled trainer (n= 1)</li> <li>• Fun working with a trainer (n=1)</li> </ul>                                                                                                                                                                                                                                                 |                                                                                                                                                                                                                                                                                                                                                                                                                                                                                                                                                                                                     |
| • Health effects       | <ul style="list-style-type: none"> <li>• Good and useful for health (n=1)</li> <li>• Good for prevention of decline and for a longer more healthy life (n=1)</li> <li>• Improves balance and strength over time (n=1)</li> <li>• Still doing the activities (n=1)</li> </ul>                                                                                           |                                                                                                                                                                                                                                                                                                                                                                                                                                                                                                                                                                                                     |
| • Documentation        |                                                                                                                                                                                                                                                                                                                                                                        | <ul style="list-style-type: none"> <li>• Many sheets to keep track of (n=1)</li> <li>• Takes time, effort and discipline (n=1).</li> <li>• Wishes every week a new activity planner (n=1)</li> </ul>                                                                                                                                                                                                                                                                                                                                                                                                |
| • Study design         | •                                                                                                                                                                                                                                                                                                                                                                      | <ul style="list-style-type: none"> <li>• Study too short to induce an effect (n=2)</li> </ul>                                                                                                                                                                                                                                                                                                                                                                                                                                                                                                       |

Post intervention, participants were given the opportunity to briefly explain why they had scored the acceptability questionnaire in a specific way and to suggest any changes to the aLiFE programme. A summary of the answers is shown in the table.
