# Supplementary material
Source: publisher figshare collection journal article supplement (https://karger.figshare.com/articles/dataset/_/8159657)
Supplement: Supplementary file 1 [file 1 › 499962_sm8.pdf]

**Supplementary Figure 3. Process of screening, inclusion, training, and follow-up assessment**

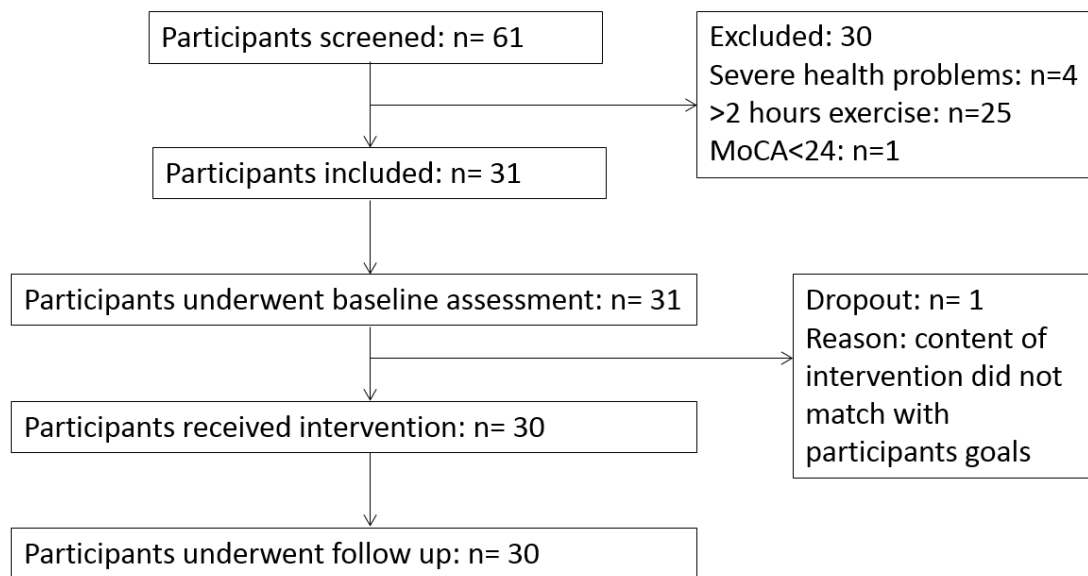

MoCA= Montreal Cognitive Assessment
