# Supplementary material
Source: publisher figshare collection journal article supplement (https://karger.figshare.com/articles/dataset/_/8159657)

Supplementary Figure 1. Basic pattern of the aLiFE activity “Stepping and changing direction”

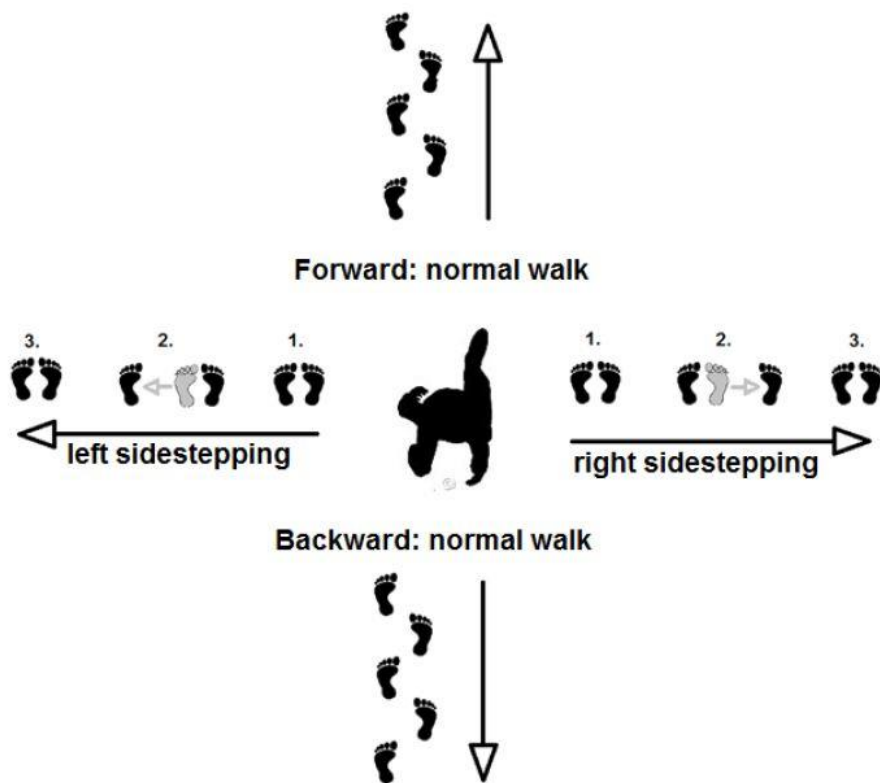

Supplement: Supplementary file 1 [file 1 › 499962_sm6.pdf]

**Supplementary Figure 2. Basic pattern of the aLiFE activity “Square stepping, hopping, or jumping”**

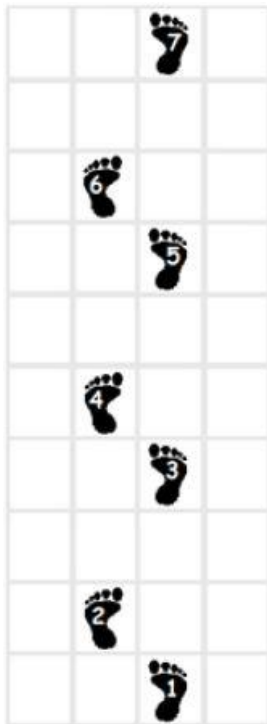

Supplement: Supplementary file 1 [file 1 › 499962_sm7.pdf]
